# Supplementary material for: Prognostic value and immunotherapy analysis of immune cell-related genes in laryngeal cancer
Source: PeerJ journal article supplement (doi:10.7717/peerj.19239), 2025-04-14
Supplement: IHC.zip [file IHC.zip]

## Sheet: OLR1 
P		Area	Mean	StdDev	Mode	intDen	％Area	RawintDen
252P1	1	474557	255	0	255	121012035	14.528	121012035
252P2	2	272220	255	0	255	69416100	8.334	69416100
252P3	3	494413	255	0	255	126075315	15.136	126075315
253P1	1	420976	255	0	255	107348880	12.887	107348880
253P2	2	537897	255	0	255	137163735	16.467	137163735
253P3	3	707436	255	0	255	180396180	21.657	180396180
254P1	1	1324290	255	0	255	337693950	40.541	337693950
254P2	2	627455	255	0	255	160001025	19.208	160001025
254P3	3	511879	255	0	255	130529145	15.67	130529145
255P1	1	1248132	255	0	255	318273660	38.209	318273660
255P2	2	1057839	255	0	255	269748945	32.384	269748945
255P3	3	1373318	255	0	255	350196090	42.042	350196090
256P1	1	814112	255	0	255	207598560	24.923	207598560
256P2	2	949235	255	0	255	242054925	29.059	242054925
256P3	3	922816	255	0	255	235318080	28.25	235318080
257P1	1	982412	255	0	255	250515060	30.075	250515060
257P2	2	1025370	255	0	255	261469350	31.39	261469350
257P3	3	1117381	255	0	255	284932155	34.207	284932155
258P1	1	848615	255	0	255	216396825	25.979	216396825
258P2	2	843447	255	0	255	215078985	25.821	215078985
258P3	3	1239426	255	0	255	316053630	37.943	316053630
259P1	1	901553	255	0	255	229896015	27.599	229896015
259P2	2	1029932	255	0	255	262632660	31.53	262632660
259P3	3	389544	255	0	255	99333720	11.925	99333720
260P1	1	46548	255	0	255	11869740	1.425	11869740
260P2	2	132431	255	0	255	33769905	4.054	33769905
260P3	3	154354	255	0	255	39360270	4.725	39360270
262P1	1	395490	255	0	255	100849950	12.107	100849950
262P2	2	318978	255	0	255	81339390	9.765	81339390
262P3	3	501911	255	0	255	127987305	15.365	127987305
CA		Area	Mean	StdDev	Mode	intDen	％Area	RawintDen
252C1	1	990291	255	0	255	252524205	30.316	252524205
252C2	2	1158876	255	0	255	295513380	35.477	295513380
252C3	3	1539356	255	0	255	392535780	47.125	392535780
253C1	1	1043302	255	0	255	266042010	31.939	266042010
253C2	2	1071877	255	0	255	273328635	32.814	273328635
253C3	3	1001718	255	0	255	255438090	30.666	255438090
254C1	1	1194805	255	0	255	304675275	36.577	304675275
254C2	2	1263702	255	0	255	322244010	38.686	322244010
254C3	3	1109613	255	0	255	282951315	33.969	282951315
255C1	1	1607547	255	0	255	409924485	49.212	409924485
255C2	2	1603211	255	0	255	408818805	49.079	408818805
255C3	3	1577903	255	0	255	402365265	48.305	402365265
256C1	1	671959	255	0	255	171349545	20.571	171349545
256C2	2	624803	255	0	255	159324765	19.127	159324765
256C3	3	581893	255	0	255	148382715	17.814	148382715
257C1	1	2149879	255	0	255	548219145	65.815	548219145
257C2	2	2044152	255	0	255	521258760	62.578	521258760
257C3	3	1456967	255	0	255	371526585	44.602	371526585
258C1	1	971721	255	0	255	247788855	29.748	247788855
258C2	2	855502	255	0	255	218153010	26.19	218153010
258C3	3	832417	255	0	255	212266335	25.483	212266335
259C1	1	1250169	255	0	255	318793095	38.272	318793095
259C2	2	1113816	255	0	255	284023080	34.098	284023080
259C3	3	1326784	255	0	255	338329920	40.617	338329920
260C1	1	1228958	255	0	255	313384290	37.622	313384290
260C2	2	1228193	255	0	255	313189215	37.599	313189215
260C3	3	1145124	255	0	255	292006620	35.056	292006620
262C1	1	1357844	255	0	255	346250220	41.568	346250220
262C2	2	635149	255	0	255	161962995	19.444	161962995
262C3	3	665704	255	0	255	169754520	20.379	169754520

## Sheet: contrast
P	Ca	P（mean）	Ca（mean）
14.528	30.316	12.666	37.6393
8.334	35.477
15.136	47.125
12.887	31.939	17.0037	31.8063
16.467	32.814
21.657	30.666
40.541	36.577	25.1397	36.4107
19.208	38.686
15.67	33.969
38.209	49.212	37.545	48.8653
32.384	49.079
42.042	48.305
24.923	20.571	27.4107	19.1707
29.059	19.127
28.25	17.814
30.075	65.815	31.8907	57.665
31.39	62.578
34.207	44.602
25.979	29.748	29.9143	27.1403
25.821	26.19
37.943	25.483
27.599	38.272	23.6847	37.6623
31.53	34.098
11.925	40.617
1.425	37.622	3.40133	36.759
4.054	37.599
4.725	35.056
12.107	41.568	12.4123	27.1303
9.765	19.444
15.365	20.379

## Sheet: Difference for T test
Ca（mean）	P（mean）		the difference
37.6393	12.666		24.9733
31.8063	17.0037		14.8027
36.4107	25.1397		11.271
48.8653	37.545		11.3203
19.1707	27.4107		-8.24
57.665	31.8907		25.7743
27.1403	29.9143		-2.774
37.6623	23.6847		13.9777
36.759	3.40133		33.3577
27.1303	12.4123		14.718
Data processing methods:
For paired samples, the difference was tested for normal distribution by Shapiro-wilk test.
T-test was used if it meets the criteria.
Otherwise, the Wilcoxon test was employed.
