# Supplementary material for: Prognostic value and immunotherapy analysis of immune cell-related genes in laryngeal cancer
Source: PeerJ journal article supplement (doi:10.7717/peerj.19239), 2025-04-14
Supplement: pcr.zip [file pcr.zip]

## Sheet: OLR1
OLR1	CT1	CT2	CT3	GAPDH	△CT1	△CT2	△CT3	mean	△△CT1	△△CT2	△△CT3	Relative multiple 1	Relative multiple 2	Relative multiple 3	Mean of relative multiple	SD
249C	28.84	29.04	28.92	19.59	9.25	9.45	9.33	9.34333	0.366667	0.566667	0.446667	0.775572	0.675175	0.733736	0.728161	0.0411762
249P	30.73	30.88	30.5	21.82	8.91	9.06	8.68	8.88333	0.0266667	0.176667	-0.203333	0.981686	0.884745	1.15136	1.00593	0.110185
251C	26.66	26.56	26.59	19.06	7.6	7.5	7.53	7.54333	-3.53	-3.63	-3.6	11.5514	12.3805	12.1257	12.0192	0.34675
251P	32.17	32.63	31.71	21.04	11.13	11.59	10.67	11.13	0	0.46	-0.46	1	0.726986	1.37554	1.03418	0.265872
252C	23.92	23.83	24.33	17.89	6.03	5.94	6.44	6.13667	-5.12	-5.21	-4.71	34.7755	37.014	26.1729	32.6541	4.67318
252P	29.06	29.57	29.36	18.18	10.88	11.39	11.18	11.15	-0.27	0.24	0.03	1.20581	0.846745	0.97942	1.01066	0.148241
254C	26.71	26.76	26.71	16.47	10.24	10.29	10.24	10.2567	-0.493333	-0.443333	-0.493333	1.40769	1.35974	1.40769	1.39171	0.0226044
254P	30.46	30.41	30.34	19.67	10.79	10.74	10.67	10.7333	0.0566667	0.00666667	-0.0633333	0.961483	0.99539	1.04488	1.00058	0.034243
255C	32.98	34.03	32.7	23.05	9.93	10.98	9.65	10.1867	-1.28	-0.23	-1.56	2.42839	1.17283	2.94854	2.18325	0.745363
255P	32.06	32.11	32.52	21.02	11.04	11.09	11.5	11.21	-0.17	-0.12	0.29	1.12506	1.08673	0.817902	1.0099	0.136661
256C	32.77	33.32	32.73	26.06	6.71	7.26	6.67	6.88	1.76333	2.31333	1.72333	0.294567	0.201195	0.302848	0.266203	0.046092
256P	29.61	29.31	29.3	24.46	5.15	4.85	4.84	4.94667	0.203333	-0.0966667	-0.106667	0.868541	1.0693	1.07674	1.00486	0.0964393
257C	28.34	28.38	28.73	17.9	10.44	10.48	10.83	10.5833	-0.753333	-0.713333	-0.363333	1.68568	1.63959	1.28639	1.53722	0.178357
257P	28.78	29.02	29.09	17.77	11.01	11.25	11.32	11.1933	-0.183333	0.0566667	0.126667	1.1355	0.961483	0.915945	1.00431	0.0946123
258C	31.37	31.53	31.85	25.15	6.22	6.38	6.7	6.43333	-5.47333	-5.31333	-4.99333	44.426	39.7624	31.8525	38.6803	5.18985
258P	31.91	31.77	31.55	20.05	11.86	11.72	11.5	11.6933	0.166667	0.0266667	-0.193333	0.890899	0.981686	1.1434	1.00533	0.104431
259C	27.94	28.15	27.92	17.42	10.52	10.73	10.5	10.5833	-0.216667	-0.00666667	-0.236667	1.16205	1.00463	1.17827	1.11498	0.0783096
259P	29.39	29.41	29.39	18.66	10.73	10.75	10.73	10.7367	-0.00666667	0.0133333	-0.00666667	1.00463	0.990801	1.00463	1.00002	0.00652002
260C	28.44	28.31	28.33	17.77	10.67	10.54	10.56	10.59	-0.825	-0.955	-0.935	1.77154	1.93858	1.91189	1.874	0.0732696
260P		35.07	37.48	24.78		10.29	12.7	11.495		-1.205	1.205		2.30537	0.433769	1.36957	0.935802
261C	29	29.29	29.68	16.03	12.97	13.26	13.65	13.2933	0.813333	1.10333	1.49333	0.569066	0.46544	0.355191	0.463232	0.0873279
261P	33.2	34.13	33.4	21.42	11.78	12.71	11.98	12.1567	-0.376667	0.553333	-0.176667	1.29834	0.681444	1.13027	1.03668	0.260395
262C	24.98	25.1	25.1	15.76	9.22	9.34	9.34	9.3	-4.04667	-3.92667	-3.92667	16.526	15.207	15.207	15.6467	0.621773
262P	32.8	32.55	32.83	19.46	13.34	13.09	13.37	13.2667	0.0733333	-0.176667	0.103333	0.950439	1.13027	0.93088	1.00386	0.0897389
263C	29.09	29.09	29.41	22.28	6.81	6.81	7.13	6.91667	-5.38333	-5.38333	-5.06333	41.7393	41.7393	33.4361	38.9715	3.91416
263P	33.04	32.31	33.78	20.85	12.19	11.46	12.93	12.1933	-0.00333333	-0.733333	0.736667	1.00231	1.66248	0.600124	1.0883	0.437945
264C	30.89	31.15	31.72	21.59	9.3	9.56	10.13	9.66333	-1.03333	-0.773333	-0.203333	2.04675	1.70921	1.15136	1.63577	0.369213
264P	31.28	31.84	32.35	21.49	9.79	10.35	10.86	10.3333	-0.543333	0.0166667	0.526667	1.45734	0.988514	0.694157	1.04667	0.314269
265C	26.23	26.24	26.31	19.78	6.45	6.46	6.53	6.48	-1.10667	-1.09667	-1.02667	2.15348	2.1386	2.03731	2.1098	0.0516124
265P	28.55	28.85	28.81	21.18	7.37	7.67	7.63	7.55667	-0.186667	0.113333	0.0733333	1.13813	0.92445	0.950439	1.00434	0.0951976
266C	33.26	33.4	32.12	22.82	10.44	10.58	9.3	10.1067	-4.465	-4.325	-5.605	22.0851	20.0426	48.6713	30.2663	13.041
266P	34.67	41.32		23.09	11.58	18.23		14.905	-3.325	3.325	-14.905	10.0213	0.0997873		5.06055	4.96076
269C	30.03	29.36	30.36	20.41	9.62	8.95	9.95	9.50667	-1.48667	-2.15667	-1.15667	2.80241	4.45883	2.22942	3.16355	0.945302
269P	31.9	31.13	32.12	20.61	11.29	10.52	11.51	11.1067	0.183333	-0.586667	0.403333	0.880666	1.50177	0.756109	1.04618	0.326139
270C	30.75	30.83	30.63	21.88	8.87	8.95	8.75	8.85667	-0.22	-0.14	-0.34	1.16473	1.10191	1.26576	1.17747	0.0674952
270P	28.37	28.38	28.3	19.26	9.11	9.12	9.04	9.09	0.02	0.03	-0.05	0.986233	0.97942	1.03526	1.00031	0.0248757
271C	29.71	29.72	29.75	23.75	5.96	5.97	6	5.97667	-3.60667	-3.59667	-3.56667	12.1819	12.0977	11.8488	12.0428	0.141434
271P	31.06	30.42	29.8	20.86	10.2	9.56	8.94	9.56667	0.633333	-0.00666667	-0.626667	0.644685	1.00463	1.54399	1.06444	0.369569
272C	24.45	24.49	24.49	18.94	5.51	5.55	5.55	5.53667	-2.98	-2.94	-2.94	7.88986	7.67411	7.67411	7.74603	0.101705
272P			35.14	26.65			8.49	8.49			0			1	1	0
273C	30.72	30.55	30.79	22.15	8.57	8.4	8.64	8.53667	-0.656667	-0.826667	-0.586667	1.57644	1.77358	1.50177	1.61726	0.11466
273P	32.46	33.13	33.16	23.69	8.77	9.44	9.47	9.22667	-0.456667	0.213333	0.243333	1.37237	0.862542	0.844791	1.02657	0.244625
274C	27.31	27.69	27.8	22.11	5.2	5.58	5.69	5.49	-2.40667	-2.02667	-1.91667	5.30248	4.07462	3.7755	4.3842	0.660704
274P	29.23	29.39	29.18	21.66	7.57	7.73	7.52	7.60667	-0.0366667	0.123333	-0.0866667	1.02574	0.918064	1.06191	1.00191	0.061097
275C	29.14	29.67	29.45	22.36	6.78	7.31	7.09	7.06	-3.06333	-2.53333	-2.75333	8.35902	5.78908	6.74273	6.96361	1.06073
275P	31.84	31.66	32.57	22.18	9.66	9.48	10.39	9.84333	-0.183333	-0.363333	0.546667	1.1355	1.28639	0.6846	1.0355	0.255656
276C	26.69	26.61	26.69	19.56	7.13	7.05	7.13	7.10333	2.79667	2.71667	2.79667	0.143919	0.152125	0.143919	0.146655	0.00386835
276P	35.65	34.47	37.38	31.5	4.15	2.97	5.88	4.33333	-0.183333	-1.36333	1.54667	1.1355	2.57279	0.3423	1.3502	0.923161
277C	28.29	27.93	28	18.37	9.92	9.56	9.63	9.70333	1.05	0.69	0.76	0.482968	0.619854	0.590496	0.564439	0.0588424
277P	31.6	31.64	31.32	22.65	8.95	8.99	8.67	8.87	0.08	0.12	-0.2	0.946058	0.920188	1.1487	1.00498	0.102171
278C	26.57	26.54	26.33	18.07	8.5	8.47	8.26	8.41	-0.696667	-0.726667	-0.936667	1.62076	1.65481	1.9141	1.72989	0.130997
278P	32.05	32.48	33.32	23.42	8.63	9.06	9.9	9.19667	-0.566667	-0.136667	0.703333	1.4811	1.09936	0.614152	1.06487	0.354769
279C	30.53		30.28	18.8	11.73		11.48	11.605	0.67		0.42	0.628507		0.747425	0.687966	0.059459
279P	34.77		33.27	22.96	11.81		10.31	11.06	0.75		-0.75	0.594604		1.68179	1.1382	0.543595
280C	28.73	28.85	28.57	18.15	10.58	10.7	10.42		-3.635	-3.515	-3.795	12.4235	11.432	13.8806	12.5787	1.00567
280P	37.59		42.08	25.62	11.97		16.46	14.215	-2.245		2.245	4.74037		0.210954	2.47566	2.26471
285C	28.41	28.4	28.38	19.13	9.28	9.27	9.25	9.26667	0.0333333	0.0233333	0.00333333	0.97716	0.983957	0.997692	0.98627	0.0085403
285P	33.96	33.77	32.64	24.21	9.75	9.56	8.43	9.24667	0.503333	0.313333	-0.816667	0.705475	0.80478	1.76133	1.09053	0.476059

## Sheet: organization of OLR1
OLR1	CT1	CT2	CT3	GAPDH	△CT1	△CT2	△CT3	mean	△△CT1	△△CT2	△△CT3	Relative multiple 1	Relative multiple 2	Relative multiple 3	Mean of relative multiple	SD
249C	28.84	29.04	28.92	19.59	9.25	9.45	9.33	9.34333	0.363333	0.563333	0.443333	0.777366	0.676737	0.735433	0.729846	0.0412715
251C	26.66	26.56	26.59	19.0567	7.60333	7.50333	7.53333	7.54667	-3.53	-3.63	-3.6	11.5514	12.3805	12.1257	12.0192	0.34675
252C	23.92	23.83	24.33	17.8867	6.03333	5.94333	6.44333	6.14	-5.11333	-5.20333	-4.70333	34.6152	36.8434	26.0522	32.5036	4.65163
254C	26.71	26.76	26.71	16.47	10.24	10.29	10.24	10.2567	-0.493333	-0.443333	-0.493333	1.40769	1.35974	1.40769	1.39171	0.0226044
255C	32.98	34.03	32.7	23.05	9.93	10.98	9.65	10.1867	-1.28	-0.23	-1.56	2.42839	1.17283	2.94854	2.18325	0.745363
256C	32.77	33.32	32.73	26.06	6.71	7.26	6.67	6.88	1.76333	2.31333	1.72333	0.294567	0.201195	0.302848	0.266203	0.046092
257C	28.34	28.38	28.73	17.9	10.44	10.48	10.83	10.5833	-0.753333	-0.713333	-0.363333	1.68568	1.63959	1.28639	1.53722	0.178357
258C	31.37	31.53	31.85	25.15	6.22	6.38	6.7	6.43333	-5.47333	-5.31333	-4.99333	44.426	39.7624	31.8525	38.6803	5.18985
259C	27.94	28.15	27.92	17.42	10.52	10.73	10.5	10.5833	-0.216667	-0.00666667	-0.236667	1.16205	1.00463	1.17827	1.11498	0.0783096
260C	28.44	28.31	28.33	17.77	10.67	10.54	10.56	10.59	-0.825	-0.955	-0.935	1.77154	1.93858	1.91189	1.874	0.0732696
261C	29	29.29	29.68	16.03	12.97	13.26	13.65	13.2933	0.813333	1.10333	1.49333	0.569066	0.46544	0.355191	0.463232	0.0873279
262C	24.98	25.1	25.1	15.76	9.22	9.34	9.34	9.3	-4.04667	-3.92667	-3.92667	16.526	15.207	15.207	15.6467	0.621773
263C	29.09	29.09	29.41	22.28	6.81	6.81	7.13	6.91667	-5.38333	-5.38333	-5.06333	41.7393	41.7393	33.4361	38.9715	3.91416
264C	30.89	31.15	31.72	21.59	9.3	9.56	10.13	9.66333	-1.03333	-0.773333	-0.203333	2.04675	1.70921	1.15136	1.63577	0.369213
265C	26.23	26.24	26.31	19.78	6.45	6.46	6.53	6.48	-1.10667	-1.09667	-1.02667	2.15348	2.1386	2.03731	2.1098	0.0516124
266C	33.26	33.4	32.12	22.82	10.44	10.58	9.3	10.1067	-4.465	-4.325	-5.605	22.0851	20.0426	48.6713	30.2663	13.041
269C	30.03	29.36	30.36	20.41	9.62	8.95	9.95	9.50667	-1.48667	-2.15667	-1.15667	2.80241	4.45883	2.22942	3.16355	0.945302
270C	30.75	30.83	30.63	21.88	8.87	8.95	8.75	8.85667	-0.22	-0.14	-0.34	1.16473	1.10191	1.26576	1.17747	0.0674952
271C	29.71	29.72	29.75	23.75	5.96	5.97	6	5.97667	-3.60667	-3.59667	-3.56667	12.1819	12.0977	11.8488	12.0428	0.141434
272C	24.45	24.49	24.49	18.94	5.51	5.55	5.55	5.53667	-2.98	-2.94	-2.94	7.88986	7.67411	7.67411	7.74603	0.101705
273C	30.72	30.55	30.79	22.15	8.57	8.4	8.64	8.53667	-0.656667	-0.826667	-0.586667	1.57644	1.77358	1.50177	1.61726	0.11466
274C	27.31	27.69	27.8	22.11	5.2	5.58	5.69	5.49	-2.40667	-2.02667	-1.91667	5.30248	4.07462	3.7755	4.3842	0.660704
275C	29.14	29.67	29.45	22.36	6.78	7.31	7.09	7.06	-3.06333	-2.53333	-2.75333	8.35902	5.78908	6.74273	6.96361	1.06073
276C	26.69	26.61	26.69	19.56	7.13	7.05	7.13	7.10333	2.79667	2.71667	2.79667	0.143919	0.152125	0.143919	0.146655	0.00386835
277C	28.29	27.93	28	18.37	9.92	9.56	9.63	9.70333	1.05	0.69	0.76	0.482968	0.619854	0.590496	0.564439	0.0588424
278C	26.57	26.54	26.33	18.07	8.5	8.47	8.26	8.41	-0.696667	-0.726667	-0.936667	1.62076	1.65481	1.9141	1.72989	0.130997
279C	30.53		30.28	18.8	11.73		11.48	11.605	0.67		0.42	0.628507		0.747425	0.687966	0.059459
280C	28.73	28.85	28.57	18.15	10.58	10.7	10.42		-3.635	-3.515	-3.795	12.4235	11.432	13.8806	12.5787	1.00567
285C	28.41	28.4	28.38	19.13	9.28	9.27	9.25	9.26667	0.0333333	0.0233333	0.00333333	0.97716	0.983957	0.997692	0.98627	0.0085403
249P	30.73	30.88	30.5	21.8167	8.91333	9.06333	8.68333	8.88667	0.0266667	0.176667	-0.203333	0.981686	0.884745	1.15136	1.00593	0.110185
251P	32.17	32.63	31.71	21.0367	11.1333	11.5933	10.6733	11.1333	0	0.46	-0.46	1	0.726986	1.37554	1.03418	0.265872
252P	29.06	29.57	29.36	18.1833	10.8767	11.3867	11.1767	11.1467	-0.27	0.24	0.03	1.20581	0.846745	0.97942	1.01066	0.148241
254P	30.46	30.41	30.34	19.67	10.79	10.74	10.67	10.7333	0.0566667	0.00666667	-0.0633333	0.961483	0.99539	1.04488	1.00058	0.034243
255P	32.06	32.11	32.52	21.02	11.04	11.09	11.5	11.21	-0.17	-0.12	0.29	1.12506	1.08673	0.817902	1.0099	0.136661
256P	29.61	29.31	29.3	24.46	5.15	4.85	4.84	4.94667	0.203333	-0.0966667	-0.106667	0.868541	1.0693	1.07674	1.00486	0.0964393
257P	28.78	29.02	29.09	17.77	11.01	11.25	11.32	11.1933	-0.183333	0.0566667	0.126667	1.1355	0.961483	0.915945	1.00431	0.0946123
258P	31.91	31.77	31.55	20.05	11.86	11.72	11.5	11.6933	0.166667	0.0266667	-0.193333	0.890899	0.981686	1.1434	1.00533	0.104431
259P	29.39	29.41	29.39	18.66	10.73	10.75	10.73	10.7367	-0.00666667	0.0133333	-0.00666667	1.00463	0.990801	1.00463	1.00002	0.00652002
260P		35.07	37.48	24.78		10.29	12.7	11.495		-1.205	1.205		2.30537	0.433769	1.36957	0.935802
261P	33.2	34.13	33.4	21.42	11.78	12.71	11.98	12.1567	-0.376667	0.553333	-0.176667	1.29834	0.681444	1.13027	1.03668	0.260395
262P	32.8	32.55	32.83	19.46	13.34	13.09	13.37	13.2667	0.0733333	-0.176667	0.103333	0.950439	1.13027	0.93088	1.00386	0.0897389
263P	33.04	32.31	33.78	20.85	12.19	11.46	12.93	12.1933	-0.00333333	-0.733333	0.736667	1.00231	1.66248	0.600124	1.0883	0.437945
264P	31.28	31.84	32.35	21.49	9.79	10.35	10.86	10.3333	-0.543333	0.0166667	0.526667	1.45734	0.988514	0.694157	1.04667	0.314269
265P	28.55	28.85	28.81	21.18	7.37	7.67	7.63	7.55667	-0.186667	0.113333	0.0733333	1.13813	0.92445	0.950439	1.00434	0.0951976
266P	34.67	41.32		23.09	11.58	18.23		14.905	-3.325	3.325	-14.905	10.0213	0.0997873		5.06055	4.96076
269P	31.9	31.13	32.12	20.61	11.29	10.52	11.51	11.1067	0.183333	-0.586667	0.403333	0.880666	1.50177	0.756109	1.04618	0.326139
270P	28.37	28.38	28.3	19.26	9.11	9.12	9.04	9.09	0.02	0.03	-0.05	0.986233	0.97942	1.03526	1.00031	0.0248757
271P	31.06	30.42	29.8	20.86	10.2	9.56	8.94	9.56667	0.633333	-0.00666667	-0.626667	0.644685	1.00463	1.54399	1.06444	0.369569
272P			35.14	26.65			8.49	8.49			0			1	1	0
273P	32.46	33.13	33.16	23.69	8.77	9.44	9.47	9.22667	-0.456667	0.213333	0.243333	1.37237	0.862542	0.844791	1.02657	0.244625
274P	29.23	29.39	29.18	21.66	7.57	7.73	7.52	7.60667	-0.0366667	0.123333	-0.0866667	1.02574	0.918064	1.06191	1.00191	0.061097
275P	31.84	31.66	32.57	22.18	9.66	9.48	10.39	9.84333	-0.183333	-0.363333	0.546667	1.1355	1.28639	0.6846	1.0355	0.255656
276P	35.65	34.47	37.38	31.5	4.15	2.97	5.88	4.33333	-0.183333	-1.36333	1.54667	1.1355	2.57279	0.3423	1.3502	0.923161
277P	31.6	31.64	31.32	22.65	8.95	8.99	8.67	8.87	0.08	0.12	-0.2	0.946058	0.920188	1.1487	1.00498	0.102171
278P	32.05	32.48	33.32	23.42	8.63	9.06	9.9	9.19667	-0.566667	-0.136667	0.703333	1.4811	1.09936	0.614152	1.06487	0.354769
279P	34.77		33.27	22.96	11.81		10.31	11.06	0.75		-0.75	0.594604		1.68179	1.1382	0.543595
280P	37.59		42.08	25.62	11.97		16.46	14.215	-2.245		2.245	4.74037		0.210954	2.47566	2.26471
285P	33.96	33.77	32.64	24.21	9.75	9.56	8.43	9.24667	0.503333	0.313333	-0.816667	0.705475	0.80478	1.76133	1.09053	0.476059

## Sheet: RENBP
RENBP	CT1	CT2	CT3	GAPDH	△CT1	△CT2	△CT3	mean	△△CT1	△△CT2	△△CT3	Relative multiple 1	Relative multiple 2	Relative multiple 3	Mean of relative multiple	SD
249C	28.05	27.98	27.63	19.59	8.46	8.39	8.04	8.29667	-0.476667	-0.546667	-0.896667	1.39152	1.46071	1.86176	1.57133	0.207297
249P	30.66	30.95	30.66	21.82	8.84	9.13	8.84	8.93667	-0.0966667	0.193333	-0.0966667	1.0693	0.874583	1.0693	1.00439	0.0917906
251C	27.51	27.7	27.59	19.06	8.45	8.64	8.53	8.54	-0.23	-0.04	-0.15	1.17283	1.02811	1.10957	1.10351	0.0592375
251P	29.79	29.72	29.65	21.04	8.75	8.68	8.61	8.68	0.07	0	-0.07	0.952638	1	1.04972	1.00078	0.0396361
252C	27.23	27.06	27.16	17.89	9.34	9.17	9.27	9.26	-0.466667	-0.636667	-0.536667	1.38191	1.55473	1.45062	1.46242	0.0710454
252P	27.79	28.12	28.05	18.18	9.61	9.94	9.87	9.80667	-0.196667	0.133333	0.0633333	1.14605	0.911722	0.95705	1.00494	0.101479
254C	27.89	27.65	27.61	16.47	11.42	11.18	11.14	11.2467	1.19667	0.956667	0.916667	0.436282	0.515246	0.529732	0.493753	0.0410662
254P	29.73	30.03	29.92	19.67	10.06	10.36	10.25	10.2233	-0.163333	0.136667	0.0266667	1.11987	0.909618	0.981686	1.00373	0.0872388
255C	31.92	32.04	31.92	23.05	8.87	8.99	8.87	8.91	-0.88	-0.76	-0.88	1.84038	1.69349	1.84038	1.79141	0.0692421
255P	30.6	31.06	30.65	21.02	9.58	10.04	9.63	9.75	-0.17	0.29	-0.12	1.12506	0.817902	1.08673	1.0099	0.136661
256C	35.84	35.7	36.29	26.06	9.78	9.64	10.23	9.88333	2.33	2.19	2.78	0.198884	0.219151	0.145592	0.187876	0.0310231
256P	31.91	31.83	31.99	24.46	7.45	7.37	7.53	7.45	0	-0.08	0.08	1	1.05702	0.946058	1.00103	0.0453052
257C	29.11	29.17	29.15	17.9	11.21	11.27	11.25	11.2433	0.913333	0.973333	0.953333	0.530957	0.509328	0.516438	0.518908	0.00900103
257P	27.81	28.22	28.17	17.77	10.04	10.45	10.4	10.2967	-0.256667	0.153333	0.103333	1.19472	0.899171	0.93088	1.00826	0.132481
258C	33.05	33.43	32.25	25.15	7.9	8.28	7.1	7.76	-2.45333	-2.07333	-3.25333	5.4768	4.20858	9.53566	6.40701	2.27207
258P	30.35	30.45	30.41	20.05	10.3	10.4	10.36	10.3533	-0.0533333	0.0466667	0.00666667	1.03766	0.968171	0.99539	1.00041	0.0285897
259C	27.12	27.42	27.11	17.42	9.7	10	9.69	9.79667	-0.513333	-0.213333	-0.523333	1.42734	1.15936	1.43727	1.34133	0.128731
259P	28.82	28.92	28.88	18.66	10.16	10.26	10.22	10.2133	-0.0533333	0.0466667	0.00666667	1.03766	0.968171	0.99539	1.00041	0.0285897
260C	28.01	27.78	28.02	17.77	10.24	10.01	10.25	10.1667	2.45667	2.22667	2.46667	0.182167	0.213652	0.180909	0.192242	0.0151474
260P	32.81	32.4	32.48	24.78	8.03	7.62	7.7	7.78333	0.246667	-0.163333	-0.0833333	0.842842	1.11987	1.05946	1.00739	0.11894
261C	25.61	25.79	25.65	16.03	9.58	9.76	9.62	9.65333	1.05	1.23	1.09	0.482968	0.426317	0.469761	0.459682	0.0242008
261P	29.46	30.71	29.68	21.42	8.04	9.29	8.26	8.53	-0.49	0.76	-0.27	1.40444	0.590496	1.20581	1.06692	0.346503
262C	25.9	25.72	25.8	15.76	10.14	9.96	10.04	10.0467	-1.26667	-1.44667	-1.36667	2.40605	2.72578	2.57874	2.57019	0.130667
262P	30.67	30.88	31.05	19.46	11.21	11.42	11.59	11.4067	-0.196667	0.0133333	0.183333	1.14605	0.990801	0.880666	1.00584	0.108862
263C	30.45	32.18	31.05	22.28	8.17	9.9	8.77	8.94667	-4.47	-2.74	-3.87	22.1618	6.6807	14.6213	14.4879	6.32082
263P	33.24	32.99	34.24	20.85	12.39	12.14	13.39	12.64	-0.25	-0.5	0.75	1.18921	1.41421	0.594604	1.06601	0.345759
264C	33.13	32.9	33.49	21.59	11.54	11.31	11.9	11.5833	-0.663333	-0.893333	-0.303333	1.58374	1.85746	1.23399	1.5584	0.255161
264P	34.54	33.67	32.87	21.49	13.05	12.18	11.38	12.2033	0.846667	-0.0233333	-0.823333	0.556068	1.0163	1.76949	1.11395	0.500166
265C	30.39	30.09	30.03	19.78	10.61	10.31	10.25	10.39	-1.74667	-2.04667	-2.10667	3.35582	4.1315	4.30695	3.93143	0.413267
265P	34.29	33.59	32.73	21.18	13.11	12.41	11.55	12.3567	0.753333	0.0533333	-0.806667	0.593231	0.963707	1.74917	1.10203	0.481938
266C	40.42	40.06		22.82	17.6	17.24		17.42	6.885	6.525		0.00846074	0.0108587		0.00965974	0.001199
266P		34.47	33.14	23.09		11.38	10.05	10.715		0.665	-0.665		0.630689	1.58557	1.10813	0.47744
269C	29.63	30.29	29.48	20.41	9.22	9.88	9.07	9.39	-2.89333	-2.23333	-3.04333	7.42985	4.70219	8.24394	6.79199	1.51463
269P	33.09	32.27	32.81	20.61	12.48	11.66	12.2	12.1133	0.366667	-0.453333	0.0866667	0.775572	1.3692	0.941696	1.02882	0.250056
270C	31.21	30.83	30.12	21.88	9.33	8.95	8.24	8.84	-1.44333	-1.82333	-2.53333	2.71948	3.53898	5.78908	4.01585	1.29773
270P	29.92	29.91	30.27	19.26	10.66	10.65	11.01	10.7733	-0.113333	-0.123333	0.236667	1.08172	1.08925	0.848704	1.00656	0.111663
271C	31.72	31.58	31.42	23.75	7.97	7.83	7.67	7.82333	-2.03333	-2.17333	-2.33333	4.0935	4.51064	5.03968	4.54794	0.387179
271P	31.37	30.66	30.56	20.86	10.51	9.8	9.7	10.0033	0.506667	-0.203333	-0.303333	0.703847	1.15136	1.23399	1.02973	0.232892
272C	29.13	28.79	29.16	18.94	10.19	9.85		10.02	1.605	1.265		0.328736	0.416099		0.372418	0.0436818
272P		34.65	35.82	26.65		8	9.17	8.585		-0.585	0.585		1.50004	0.666649	1.08334	0.416695
273C	30.72	30.55	30.79	22.15	8.57	8.4	8.64	8.53667	0.243333	0.0733333	0.313333	0.844791	0.950439	0.80478	0.86667	0.0614447
273P	32.04	32.2	31.81	23.69	8.35	8.51	8.12	8.32667	0.0233333	0.183333	-0.206667	0.983957	0.880666	1.15402	1.00621	0.1127
274C		31.68	32.31	22.11		9.57	10.2	9.885		-0.72	-0.09	1	1.64718	1.06437	1.23718	0.291101
274P	32.44		31.46	21.66	10.78		9.8	10.29	0.49		-0.49	0.712025		1.40444	1.05823	0.34621
275C	31.58	31.12	31.67	22.36	9.22	8.76	9.31	9.09667	-2.29333	-2.75333	-2.20333	4.90187	6.74273	4.60542	5.41668	0.945442
275P	34.54	33.67	32.87	22.18	12.36	11.49	10.69	11.5133	0.846667	-0.0233333	-0.823333	0.556068	1.0163	1.76949	1.11395	0.500166
276C	29.72	28.99	29.9	19.78	9.94	9.21	10.12	9.75667	2.43333	1.70333	2.61333	0.185137	0.307076	0.163421	0.218545	0.0632256
276P	37.88	40.95	38.19	31.5	6.38	9.45	6.69	7.50667	-1.12667	1.94333	-0.816667	2.18354	0.260015	1.76133	1.40163	0.825439
277C	28.01	28.41	28.09	18.37	9.64	10.04	9.72	9.8	-2.17333	-1.77333	-2.09333	4.51064	3.41843	4.26733	4.06547	0.468184
277P	34.11	33.74	35.54	22.65	11.46	11.09	12.89	11.8133	-0.353333	-0.723333	1.07667	1.27751	1.65099	0.474123	1.13421	0.491024
278C	29.6	29.55	29.36	18.07	11.53	11.48	11.29	11.4333	-0.96	-1.01	-1.2	1.94531	2.01391	2.2974	2.08554	0.152401
278P		36.22	35.6	23.42		12.8	12.18	12.49		0.31	-0.31	1	0.806642	1.23971	1.01545	0.177136
279C	33.93		34	18.8	15.13		15.2	15.165	0.705		0.775	0.613442		0.584389	0.598916	0.0145269
279P	37.33	37.44		22.96	14.37	14.48		14.425	-0.055	0.055		1.03886	0.962594		1.00073	0.0381323
280C	30.68	30.16		18.15	12.53	12.01		12.27	-6.33	-6.85		80.4489	115.36		97.9045	17.4556
280P		46.21	42.75	25.62		20.59	17.13	18.86		1.73	-1.73		0.301452	3.31728	1.80937	1.50791
285C	30	30.34	30.04	19.13	10.87	11.21	10.91	10.9967	0.173333	0.513333	0.213333	0.886791	0.700602	0.862542	0.816645	0.08265
285P	34.95	34.41	35.36	24.21	10.74	10.2	11.15	10.6967	0.0433333	-0.496667	0.453333	0.97041	1.41095	0.730353	1.03724	0.281842

## Sheet: organization of RENBP
RENBP	CT1	CT2	CT3	GAPDH	△CT1	△CT2	△CT3	mean	△△CT1	△△CT2	△△CT3	Relative multiple 1	Relative multiple 2	Relative multiple 3	Mean of relative multiple	SD
249C	28.05	27.98	27.63	19.59	8.46	8.39	8.04	8.29667	-0.48	-0.55	-0.9	1.39474	1.46409	1.86607	1.57497	0.207777
251C	27.51	27.7	27.59	19.0567	8.45333	8.64333	8.53333	8.54333	-0.23	-0.04	-0.15	1.17283	1.02811	1.10957	1.10351	0.0592375
252C	27.23	27.06	27.16	17.8867	9.34333	9.17333	9.27333	9.26333	-0.46	-0.63	-0.53	1.37554	1.54756	1.44393	1.45568	0.0707179
254C	27.89	27.65	27.61	16.47	11.42	11.18	11.14	11.2467	1.19667	0.956667	0.916667	0.436282	0.515246	0.529732	0.493753	0.0410662
255C	31.92	32.04	31.92	23.05	8.87	8.99	8.87	8.91	-0.88	-0.76	-0.88	1.84038	1.69349	1.84038	1.79141	0.0692421
256C	35.84	35.7	36.29	26.06	9.78	9.64	10.23	9.88333	2.33	2.19	2.78	0.198884	0.219151	0.145592	0.187876	0.0310231
257C	29.11	29.17	29.15	17.9	11.21	11.27	11.25	11.2433	0.913333	0.973333	0.953333	0.530957	0.509328	0.516438	0.518908	0.00900103
258C	33.05	33.43	32.25	25.15	7.9	8.28	7.1	7.76	-2.45333	-2.07333	-3.25333	5.4768	4.20858	9.53566	6.40701	2.27207
259C	27.12	27.42	27.11	17.42	9.7	10	9.69	9.79667	-0.513333	-0.213333	-0.523333	1.42734	1.15936	1.43727	1.34133	0.128731
260C	28.01	27.78	28.02	17.77	10.24	10.01	10.25	10.1667	2.45667	2.22667	2.46667	0.182167	0.213652	0.180909	0.192242	0.0151474
261C	25.61	25.79	25.65	16.03	9.58	9.76	9.62	9.65333	1.05	1.23	1.09	0.482968	0.426317	0.469761	0.459682	0.0242008
262C	25.9	25.72	25.8	15.76	10.14	9.96	10.04	10.0467	-1.26667	-1.44667	-1.36667	2.40605	2.72578	2.57874	2.57019	0.130667
263C	30.45	32.18	31.05	22.28	8.17	9.9	8.77	8.94667	-4.47	-2.74	-3.87	22.1618	6.6807	14.6213	14.4879	6.32082
264C	33.13	32.9	33.49	21.59	11.54	11.31	11.9	11.5833	-0.663333	-0.893333	-0.303333	1.58374	1.85746	1.23399	1.5584	0.255161
265C	30.39	30.09	30.03	19.78	10.61	10.31	10.25	10.39	-1.74667	-2.04667	-2.10667	3.35582	4.1315	4.30695	3.93143	0.413267
266C	40.42	40.06		22.82	17.6	17.24		17.42	6.885	6.525		0.00846074	0.0108587		0.00965974	0.001199
269C	29.63	30.29	29.48	20.41	9.22	9.88	9.07	9.39	-2.89333	-2.23333	-3.04333	7.42985	4.70219	8.24394	6.79199	1.51463
270C	31.21	30.83	30.12	21.88	9.33	8.95	8.24	8.84	-1.44333	-1.82333	-2.53333	2.71948	3.53898	5.78908	4.01585	1.29773
271C	31.72	31.58	31.42	23.75	7.97	7.83	7.67	7.82333	-2.03333	-2.17333	-2.33333	4.0935	4.51064	5.03968	4.54794	0.387179
272C	29.13	28.79	29.16	18.94	10.19	9.85		10.02	1.605	1.265		0.328736	0.416099		0.372418	0.0436818
273C	30.72	30.55	30.79	22.15	8.57	8.4	8.64	8.53667	0.243333	0.0733333	0.313333	0.844791	0.950439	0.80478	0.86667	0.0614447
274C		31.68	32.31	22.11		9.57	10.2	9.885		-0.72	-0.09	1	1.64718	1.06437	1.23718	0.291101
275C	31.58	31.12	31.67	22.36	9.22	8.76	9.31	9.09667	-2.29333	-2.75333	-2.20333	4.90187	6.74273	4.60542	5.41668	0.945442
276C	29.72	28.99	29.9	19.78	9.94	9.21	10.12	9.75667	2.43333	1.70333	2.61333	0.185137	0.307076	0.163421	0.218545	0.0632256
277C	28.01	28.41	28.09	18.37	9.64	10.04	9.72	9.8	-2.17333	-1.77333	-2.09333	4.51064	3.41843	4.26733	4.06547	0.468184
278C	29.6	29.55	29.36	18.07	11.53	11.48	11.29	11.4333	-0.96	-1.01	-1.2	1.94531	2.01391	2.2974	2.08554	0.152401
279C	33.93		34	18.8	15.13		15.2	15.165	0.705		0.775	0.613442		0.584389	0.598916	0.0145269
280C	30.68	30.16		18.15	12.53	12.01		12.27	-6.33	-6.85		80.4489	115.36		97.9045	17.4556
285C	30	30.34	30.04	19.13	10.87	11.21	10.91	10.9967	0.173333	0.513333	0.213333	0.886791	0.700602	0.862542	0.816645	0.08265
249P	30.66	30.95	30.66	21.8167	8.84333	9.13333	8.84333	8.94	-0.0966667	0.193333	-0.0966667	1.0693	0.874583	1.0693	1.00439	0.0917906
251P	29.79	29.72	29.65	21.0367	8.75333	8.68333	8.61333	8.68333	0.07	0	-0.07	0.952638	1	1.04972	1.00078	0.0396361
252P	27.79	28.12	28.05	18.1833	9.60667	9.93667	9.86667	9.80333	-0.196667	0.133333	0.0633333	1.14605	0.911722	0.95705	1.00494	0.101479
254P	29.73	30.03	29.92	19.67	10.06	10.36	10.25	10.2233	-0.163333	0.136667	0.0266667	1.11987	0.909618	0.981686	1.00373	0.0872388
255P	30.6	31.06	30.65	21.02	9.58	10.04	9.63	9.75	-0.17	0.29	-0.12	1.12506	0.817902	1.08673	1.0099	0.136661
256P	31.91	31.83	31.99	24.46	7.45	7.37	7.53	7.45	0	-0.08	0.08	1	1.05702	0.946058	1.00103	0.0453052
257P	27.81	28.22	28.17	17.77	10.04	10.45	10.4	10.2967	-0.256667	0.153333	0.103333	1.19472	0.899171	0.93088	1.00826	0.132481
258P	30.35	30.45	30.41	20.05	10.3	10.4	10.36	10.3533	-0.0533333	0.0466667	0.00666667	1.03766	0.968171	0.99539	1.00041	0.0285897
259P	28.82	28.92	28.88	18.66	10.16	10.26	10.22	10.2133	-0.0533333	0.0466667	0.00666667	1.03766	0.968171	0.99539	1.00041	0.0285897
260P	32.81	32.4	32.48	24.78	8.03	7.62	7.7	7.78333	0.246667	-0.163333	-0.0833333	0.842842	1.11987	1.05946	1.00739	0.11894
261P	29.46	30.71	29.68	21.42	8.04	9.29	8.26	8.53	-0.49	0.76	-0.27	1.40444	0.590496	1.20581	1.06692	0.346503
262P	30.67	30.88	31.05	19.46	11.21	11.42	11.59	11.4067	-0.196667	0.0133333	0.183333	1.14605	0.990801	0.880666	1.00584	0.108862
263P	33.24	32.99	34.24	20.85	12.39	12.14	13.39	12.64	-0.25	-0.5	0.75	1.18921	1.41421	0.594604	1.06601	0.345759
264P	34.54	33.67	32.87	21.49	13.05	12.18	11.38	12.2033	0.846667	-0.0233333	-0.823333	0.556068	1.0163	1.76949	1.11395	0.500166
265P	34.29	33.59	32.73	21.18	13.11	12.41	11.55	12.3567	0.753333	0.0533333	-0.806667	0.593231	0.963707	1.74917	1.10203	0.481938
266P		34.47	33.14	23.09		11.38	10.05	10.715		0.665	-0.665		0.630689	1.58557	1.10813	0.47744
269P	33.09	32.27	32.81	20.61	12.48	11.66	12.2	12.1133	0.366667	-0.453333	0.0866667	0.775572	1.3692	0.941696	1.02882	0.250056
270P	29.92	29.91	30.27	19.26	10.66	10.65	11.01	10.7733	-0.113333	-0.123333	0.236667	1.08172	1.08925	0.848704	1.00656	0.111663
271P	31.37	30.66	30.56	20.86	10.51	9.8	9.7	10.0033	0.506667	-0.203333	-0.303333	0.703847	1.15136	1.23399	1.02973	0.232892
272P		34.65	35.82	26.65		8	9.17	8.585		-0.585	0.585		1.50004	0.666649	1.08334	0.416695
273P	32.04	32.2	31.81	23.69	8.35	8.51	8.12	8.32667	0.0233333	0.183333	-0.206667	0.983957	0.880666	1.15402	1.00621	0.1127
274P	32.44		31.46	21.66	10.78		9.8	10.29	0.49		-0.49	0.712025		1.40444	1.05823	0.34621
275P	34.54	33.67	32.87	22.18	12.36	11.49	10.69	11.5133	0.846667	-0.0233333	-0.823333	0.556068	1.0163	1.76949	1.11395	0.500166
276P	37.88	40.95	38.19	31.5	6.38	9.45	6.69	7.50667	-1.12667	1.94333	-0.816667	2.18354	0.260015	1.76133	1.40163	0.825439
277P	34.11	33.74	35.54	22.65	11.46	11.09	12.89	11.8133	-0.353333	-0.723333	1.07667	1.27751	1.65099	0.474123	1.13421	0.491024
278P		36.22	35.6	23.42		12.8	12.18	12.49		0.31	-0.31	1	0.806642	1.23971	1.01545	0.177136
279P	37.33	37.44		22.96	14.37	14.48		14.425	-0.055	0.055		1.03886	0.962594		1.00073	0.0381323
280P		46.21	42.75	25.62		20.59	17.13	18.86		1.73	-1.73		0.301452	3.31728	1.80937	1.50791
285P	34.95	34.41	35.36	24.21	10.74	10.2	11.15	10.6967	0.0433333	-0.496667	0.453333	0.97041	1.41095	0.730353	1.03724	0.281842

## Sheet: DIFFERENCE
	OLR1	RENBP	The difference of OLR1	The difference of RENBP
249C	0.729846	1.57497	-0.276083	0.570571
251C	12.0192	1.10351	10.9851	0.102721
252C	32.5036	1.45568	31.4929	0.450739
254C	1.39171	0.493753	0.391127	-0.509972
255C	2.18325	1.79141	1.17336	0.781515
256C	0.266203	0.187876	-0.738656	-0.813149
257C	1.53722	0.518908	0.532911	-0.489348
258C	38.6803	6.40701	37.675	5.40661
259C	1.11498	1.34133	0.11496	0.34092
260C	1.874	0.192242	0.504431	-0.81515
261C	0.463232	0.459682	-0.573452	-0.607234
262C	15.6467	2.57019	14.6428	1.56435
263C	38.9715	14.4879	37.8832	13.4219
264C	1.63577	1.5584	0.589104	0.444443
265C	2.1098	3.93143	1.10546	2.82939
266C	30.2663	0.00965974	25.2058	-1.09847
269C	3.16355	6.79199	2.11737	5.76317
270C	1.17747	4.01585	0.177159	3.00929
271C	12.0428	4.54794	10.9784	3.51821
272C	7.74603	0.372418	6.74603	-0.710927
273C	1.61726	0.86667	0.590697	-0.139543
274C	4.3842	1.23718	3.38229	0.178949
275C	6.96361	5.41668	5.92811	4.30272
276C	0.146655	0.218545	-1.20354	-1.18308
277C	0.564439	4.06547	-0.440542	2.93126
278C	1.72989	2.08554	0.665019	1.07009
279C	0.687966	0.598916	-0.450233	-0.401811
280C	12.5787	97.9045	10.103	96.0951
285C	0.98627	0.816645	-0.104259	-0.220593
249P	1.00593	1.00439
251P	1.03418	1.00078
252P	1.01066	1.00494
254P	1.00058	1.00373
255P	1.0099	1.0099
256P	1.00486	1.00103
257P	1.00431	1.00826
258P	1.00533	1.00041
259P	1.00002	1.00041
260P	1.36957	1.00739
261P	1.03668	1.06692
262P	1.00386	1.00584
263P	1.0883	1.06601
264P	1.04667	1.11395
265P	1.00434	1.10203
266P	5.06055	1.10813
269P	1.04618	1.02882
270P	1.00031	1.00656
271P	1.06444	1.02973
272P	1	1.08334
273P	1.02657	1.00621
274P	1.00191	1.05823
275P	1.0355	1.11395
276P	1.3502	1.40163
277P	1.00498	1.13421
278P	1.06487	1.01545
279P	1.1382	1.00073
280P	2.47566	1.80937
285P	1.09053	1.03724
Data processing methods:
For paired samples, the difference was tested for normal distribution by Shapiro-wilk test.
T-test was used if it meets the criteria.
Otherwise, the Wilcoxon test was employed.
