# Supplementary material for: Prognostic value and immunotherapy analysis of immune cell-related genes in laryngeal cancer
Source: PeerJ journal article supplement (doi:10.7717/peerj.19239), 2025-04-14
Supplement: Supplement_Table.docx [file Supplement_Table.docx]

**Table S1:** Software List

| Software | Version | Purpose |
| --- | --- | --- |
| Limma1 | 3.44.4 | Analysis of differentially expressed genes |
| Heatmap2 | 4.1.0 | Drawing of heat map |
| ggplot23 | 3.3.2 | Drawing of Venn diagram and scatter plot |
| ggpubr4 | 0.4.0 | Visualization of significance test |
| survival5 | 3.1-12 | Survival analysis and model analysis |
| Survminer6 | 0.4.6 | Survival analysis |
| glmnet7 | 4.0-2 | Model analysis |
| clusterProfiler8 | 4.0.2 | Gene enrichment analysis |
| GSEA9 | 3.0.3 | Enrichment analysis |
| Rms10 | 6.1.0 | Nomogram analysis |
| TIDE11 | http://tide.dfci.harvard.edu/login/ | Immunotherapy analysis |

Reference:

1. Ritchie ME, Phipson B, Wu D, et al. limma powers differential expression analyses for RNA-sequencing and microarray studies. Nucleic Acids Research 2015;43(7):e47; doi: 10.1093/nar/gkv007.

2. Boileau P. Heatmaps for multiple network data [r package neatmaps version 1.0.7]. 2017.

3. Villanueva R, Chen ZJ. ggplot2: Elegant graphics for data analysis (2nd ed.). Measurement Interdisciplinary Research Perspectives 2019;17(3):160–167.

4. Alboukadel Kassambara (2020). Ggpubr: “ggplot2” Based Publication Ready Plots. R Package Version 0.4.0. n.d.

5. Therneau TM, Grambsch PM. Modeling Survival Data: Extending the Cox Model. Modeling Survival Data: Extending the Cox Model 2013.

6. Kassambara A, Kosinski M, Biecek P. Survminer: Drawing survival curves using “ggplot2.” 2016.

7. Jerome Friedman, Trevor Hastie. Robert Tibshirani (2010). Regularization Paths for Generalized Linear Models via Coordinate Descent. Journal of Statistical Software,33(1), 1-22. URL Http://Www.Jstatsoft.Org/V33/I01/. n.d.

8. T Wu, E Hu, S Xu. clusterProfiler 4.0: A Universal Enrichment Tool for Interpreting Omics Data. The Innovation. 2021, Doi: 10.1016/j.Xinn.2021.100141. n.d.

9. Hänzelmann S, Castelo R, Guinney J. GSVA: gene set variation analysis for microarray and RNA-Seq data. BMC Bioinformatics 2013;14(1):7; doi: 10.1186/1471-2105-14-7.

10. Anonymous. Frank E Harrell Jr (2020). Rms: Regression Modeling Strategies. R Package Version 6.0-1. Https://CRAN.R-Project.Org/Package=rms. n.d.

11. Fu J, Karen L, Zhang W, et al. TIDE-E: an online evaluator of tumor immune-suppressive function of gene sets. Eur J Immunol 2019;49:1265–1266.

**Supplementary Table S2A： WGCNA.cyan (224 genes)**

| STARD5 | HLA-B | FBXL6 | RSAD2 | HELZ2 | SP140L |
| --- | --- | --- | --- | --- | --- |
| DDX60L | IFIH1 | TRIM5 | AL589743.1 | CXCL10 | AP3S1 |
| USP18 | ZNF707 | FBXL8 | HIST1H2BE | IFI44L | EPSTI1 |
| FBXO6 | IFNK | C20orf141 | HARS2 | CCDC109B | CHP1 |
| EIF2AK2 | PARP10 | GSDMD | GPN2 | SDF4 | TTLL11 |
| STAT1 | TMEM229B | IFIT3 | CYP27B1 | SPACA5 | PMFBP1 |
| CASP4 | NMI | MX2 | PEX14 | IFI27L1 | ADH7 |
| NLRP1 | OASL | FAM111A | OAS1 | LGALS3BP | TAP1 |
| IFITM1 | HIST1H2AJ | MTHFSD | NT5DC2 | MVP | SLC6A4 |
| CTSC | CASP7 | RNF213 | CARD17 | PLSCR1 | TYRO3 |
| LRPAP1 | CD47 | GNLY | SERTAD3 | CASP1 | IL15 |
| SP110 | NAGS | HLA-G | LAMP3 | FJX1 | HERC5 |
| NTF4 | DNAJC8 | KLHDC7B | BATF2 | XRCC4 | B3GAT3 |
| TYMP | KYNU | CNTD2 | LCE5A | ABCC11 | SH2D2A |
| PML | GNPTG | ISG20 | APOL4 | BTN3A3 | PARP12 |
| IFIT5 | DAGLB | HSPB9 | MLKL | TNFRSF25 | IRF9 |
| HLA-F | CLN8 | IRF3 | CXCL11 | PAIP2B | IFI6 |
| DTX3L | NPY4R | GATA5 | NLRC5 | DHX58 | DNAH17 |
| TOR2A | GS1-114I9.3 | ZNFX1 | RAG1 | XAF1 | IFITM3 |
| SLC8A2 | SP100 | GPR39 | PSMB8 | SNRNP70 | PFDN1 |
| IL12RB2 | GIPR | ISG15 | ARFGAP1 | FETUB | TEX29 |
| ERP44 | STAT2 | TAP2 | KIAA2013 | WARS | EID2 |
| DDX58 | UBE2L6 | C19orf66 | HLA-A | TMEM50A | RPLP0 |
| ZBTB48 | PARP9 | MAD2L2 | NT5C3A | SCO2 | PSMB9 |
| LY6E | NIPSNAP3A | OAS3 | SLC25A28 | B2M | PSME1 |
| BTN3A2 | IFNGR2 | OAS2 | BTN3A1 | DDX60 | TDRD7 |
| TRIM22 | SAMD9L | SMCO2 | IFIT1 | MIIP | RPS6KA1 |
| USF1 | PSME2 | ADAR | BST2 | TRIM14 | FAM183B |
| DHRS2 | CARD16 | IFI27 | PHF11 | KIF12 | TNFSF10 |
| IFI44 | IFIT2 | CT62 | LMF2 | HERC6 | SAMD9 |
| LCAT | MOV10 | TRIM21 | PQLC2 | LIN37 | IFNB1 |
| PARP14 | IFNGR1 | WDR25 | HLA-E | PITPNM3 | TAPBP |
| AKIP1 | ODF3B | CMPK2 | SAR1A | SLC2A9 | APOL2 |
| LY6K | TLR3 | OGFR | IRF7 | AIM2 | ST8SIA6 |
| LYPD1 | TM2D2 | STOML1 | EPHA8 | TRIM34 | IFI35 |
| OTOF | GBP1 | GBP3 | TFAP2B | HLA-C | APOL1 |
| LRRC47 | MAN1B1 | NABP1 | CCM2 | RTP4 | MX1 |
| ZNF787 | TRIM69 |  |  |  |  |

**Supplementary Table S2B： WGCNA.pink(827 genes)**

| CTSA | RP11-644F5.10 | CTD-2574D22.6 | GIMAP8 | GALNT9 | FCN1 |
| --- | --- | --- | --- | --- | --- |
| IL32 | PROK2 | CCL2 | CCL7 | IMPA2 | NR1H3 |
| MAP9 | FZD8 | ABI3 | FAM124A | LGALSL | GPR150 |
| FOXP1 | APOBEC3F | CTSO | TDRD6 | CACNA2D4 | ADRBK2 |
| PHF1 | TOM1L2 | GPR141 | FAR2 | PFKFB2 | RGS9 |
| FCGR2B | TRIL | CMTM7 | RNASE2 | ST8SIA1 | RCN1 |
| IL27RA | APOC2 | CD99L2 | HOOK1 | CCL1 | BBS12 |
| EPB41L2 | FES | RPS10 | FCGR1B | PODXL | LILRB4 |
| EPHA3 | RAP1A | CHST13 | RSPO2 | HOXC4 | ADAMDEC1 |
| ATP6AP2 | RANBP3L | SAMSN1 | SOX15 | PRDM16 | AP1M1 |
| NLGN3 | TMSB4X | KPNA7 | FCGR3A | MS4A14 | LIX1L |
| KCNJ5 | LZTS1 | ADPRH | RP11-248J23.6 | KCND1 | CD274 |
| CRYBB1 | INSM2 | CD300A | PNMAL2 | HCK | CCR8 |
| PRKACB | MNDA | TNFAIP8L2 | BAIAP2 | CTSL | RNF130 |
| SLC18A2 | CD68 | TYROBP | ITGAM | RNF19A | CD101 |
| CXCR1 | CTSD | PPP5D1 | MMP7 | EMID1 | ELOVL2 |
| ABCA1 | GPR84 | CD63 | CDS1 | LACC1 | MARCO |
| CREM | GSAP | CCL13 | WBP1L | PAG1 | ARHGAP28 |
| POU6F1 | NUB1 | ELMO1 | GRAMD1B | C3AR1 | PHACTR1 |
| MMP8 | MSR1 | S100A11 | LCP2 | ATP8B4 | EMR1 |
| SPI1 | CERS3 | NDUFAF3 | ORAI2 | HFE | CST1 |
| CLEC5A | SPATA45 | LAPTM5 | PRDM8 | TPD52L1 | CLEC4D |
| RBM43 | FCGR1A | VSIG4 | KCNMB1 | PPDPF | LGMN |
| FCGRT | ST3GAL5 | CYP27A1 | APOC1 | PDE1B | NEK6 |
| ANXA3 | FIGN | CLEC4G | TM6SF1 | MATK | DOCK11 |
| RP11-248J23.7 | ARL6IP5 | VSTM1 | AZIN2 | CCRL2 | HDX |
| ASGR1 | IER5L | IL7R | KCTD12 | NOD1 | SMPD1 |
| LSAMP | CCDC71L | ADORA3 | SLFN11 | DOK1 | IL2RA |
| CALHM2 | SPP1 | BST1 | MBOAT4 | CD14 | MEGF10 |
| SLC43A2 | CAMK1 | RASGEF1B | SNX2 | ATP6V0D2 | LRRC29 |
| IL18BP | PTGER2 | ARG2 | TPK1 | TMX4 | SIRPB2 |
| STRA6 | FGR | TMSB15B | OPRL1 | RBPJ | LILRA2 |
| LY86 | UGT1A10 | LRRC25 | MRPS10 | NLRP3 | TLR8 |
| FPR3 | NLRC4 | TLR4 | COMT | 2-Mar | TMEM255A |
| ADAM8 | C5orf58 | FFAR3 | ERAP1 | AIF1 | USP51 |
| PLEKHO2 | LILRA1 | TNFSF11 | AC073657.1 | PHTF1 | ZDHHC14 |
| TFEC | CCDC62 | CD4 | S100A4 | NPC2 | TRIM8 |
| MS4A4E | ZNF22 | SHKBP1 | RP4-576H24.4 | C1R | SNX10 |
| VCAM1 | CD80 | USH1G | GATA6 | RASA4B | TTC38 |
| C10orf128 | HRH4 | TMEM176B | RAB20 | OXER1 | C3orf36 |
| CASS4 | PERP | MTMR10 | CX3CL1 | RP11-123K3.4 | PEA15 |
| PHC2 | FRMD4A | FPR1 | TBXAS1 | ZC3H12B | GOLM1 |
| RELB | MS4A4A | CCL3 | SIGLEC7 | FCAR | CCL4 |
| F2RL3 | DAAM1 | ING1 | KRT3 | LRFN5 | NDFIP2 |
| COTL1 | GUSB | ZNF331 | RIPK2 | FMNL1 | PLEKHA4 |
| CD200 | CCL3L3 | RASSF4 | LILRA6 | KCNMA1 | ACP2 |
| CISH | SERPINA1 | GBGT1 | FTL | XRRA1 | BMF |
| TNFSF12-TNFSF13 | DCP1B | SIGLEC10 | CXorf21 | LHFPL2 | HIVEP3 |
| TRIM46 | LST1 | WBSCR17 | SULT1C2 | RASGRP3 | MATN1 |
| TNFSF12 | IL3RA | TRPV2 | CHI3L1 | DPEP2 | DAPK1 |
| ZNF821 | TGM2 | SLCO2B1 | DGKZ | IGSF6 | TNFSF13B |
| GRINA | YPEL4 | FAM65C | SLC10A6 | ITGB2 | PTGIR |
| P2RX4 | B4GAT1 | ZNF358 | GHDC | CASP5 | C2 |
| FBP1 | IL18 | APOE | TRIM61 | KCNK17 | ALOX12 |
| NRROS | NMT2 | ZBTB46 | NFIB | CYP1B1 | AP1M2 |
| CTBS | PTPRJ | SEMA7A | FCGR2A | SLC8A1 | TMEM176A |
| CXCL9 | SIGLEC12 | CXCL5 | LPL | LCP1 | KLHL1 |
| NFKBIE | TLN1 | ARHGAP20 | EMR3 | CCR1 | C19orf38 |
| TMEM133 | NINJ2 | NPAS3 | DOCK4 | EBPL | TUSC1 |
| RGL1 | LAD1 | LRRC4C | GSTP1 | SLC40A1 | LY96 |
| SERPINF1 | GPR137 | C22orf46 | TNFRSF1B | C1orf54 | OR5B21 |
| IGIP | TMEM106A | SCMH1 | RNASE3 | SIRPD | GJB5 |
| HS3ST2 | CTSS | FCER1G | FAM19A1 | GAS6 | CABP4 |
| XXbac-BPG181M17.5 | FAM49A | ASL | NR1H2 | TSPYL5 | ZNF618 |
| HDAC7 | FAS | ETS1 | SCARF1 | CTSZ | CD86 |
| FYN | FAM103A1 | HOMER2 | CTLA4 | C5AR2 | C5AR1 |
| TK2 | WDR81 | HEXB | MAP3K3 | GNG2 | IRAK3 |
| CCL4L1 | ASPHD2 | CREBL2 | STXBP6 | PIK3R6 | DIO3 |
| TSPAN33 | ZNF438 | ALOX5 | PNMAL1 | VENTX | NHLRC3 |
| IL11RA | ARRB1 | MPP1 | PRAME | FAM155A | CCL17 |
| SDC3 | TNFSF14 | C1S | CD81 | NTRK1 | DRAM1 |
| CATSPER1 | GABRR2 | ITIH4 | HS3ST3B1 | RPS18 | DOK2 |
| LPAR1 | THEMIS2 | LILRB3 | SLC16A10 | IL27 | NTAN1 |
| SLC52A3 | EPHB2 | PLEKHO1 | TMEM140 | C1QA | CXCR4 |
| OCSTAMP | SMOC2 | LYSMD2 | NKX1-1 | TPST2 | CUEDC2 |
| PCYOX1L | CLCN6 | HELB | SDSL | TBC1D1 | CCL18 |
| LILRA5 | ABCD1 | PDK3 | SAMHD1 | ARL4C | PKD2L2 |
| NDN | C9orf91 | S1PR2 | AQP9 | PDE10A | HRH2 |
| PILRA | PAPSS2 | TCTN1 | ARID5A | SHISA2 | OSM |
| APOBEC3C | CYBB | ICAM1 | IL17RA | SIRPB1 | MS4A6A |
| EXOC3L1 | NINJ1 | CALM3 | CD163 | MAN2B1 | SLC11A1 |
| LAIR1 | HAPLN3 | TPBGL | NFKB2 | CLEC4E | G0S2 |
| NFAM1 | C3orf67 | ARL4D | TAB1 | MAP3K9 | TMEM8B |
| CD300E | CEACAM3 | UNC93B1 | RENBP | RTN1 | CTSB |
| RELT | CD209 | OLFM1 | LRRC37A3 | TLR1 | RP11-613M10.8 |
| OR6K3 | DNAJC18 | SLAMF8 | WIPF1 | MCOLN1 | DMXL2 |
| ENTHD1 | ENPP2 | TSPAN4 | CKLF | DUSP4 | CLCN7 |
| PIGK | SPPL2A | NDNL2 | FGF2 | SLC2A6 | F8 |
| CD33 | BEST1 | PCDHB5 | LILRB2 | CLEC4A | CAT |
| PPP3R2 | PIK3AP1 | HSD17B14 | REEP6 | ALOX5AP | MMP12 |
| CAMK1G | FCN3 | PLA2G7 | DNASE2B | CSF1 | IFNA8 |
| TPP1 | SIGLEC9 | BCL2A1 | ZNF467 | ADAMTSL5 | OLR1 |
| GSC | ETV1 | RPL10A | MS4A6E | SLC27A4 | SLFN12 |
| CCL8 | SLCO2A1 | EVI2A | GDPD2 | YPEL1 | ENTPD1 |
| PLXNC1 | OSCAR | SLC38A10 | MAN1A1 | NUCB1 | MMP9 |
| TMEM170B | SIGLEC1 | TESK1 | ATG7 | LIPA | COL22A1 |
| FAM26F | UHRF2 | IQGAP2 | JAZF1 | CXCL16 | RGS10 |
| EMILIN2 | MCEMP1 | 1-Mar | NEURL3 | CHIT1 | TCN2 |
| LILRB1 | CACNA2D2 | SH2B3 | OTOA | ARMCX2 | PPP2R2B |
| CSF3R | CSF1R | ABCA2 | RGAG4 | CD70 | OTOP3 |
| CGGBP1 | GLRB | MAP3K12 | MAFB | KBTBD11 | SH3BGRL |
| CD300LB | MARCKSL1 | CD84 | TICAM2 | MRC1 | PPM1F |
| DCSTAMP | SMARCD3 | KLHL22 | POU4F2 | RNASE6 | GPBAR1 |
| TMEM115 | FGL2 | HNMT | ARHGAP18 | EVL | GPR34 |
| GOLGA8H | SRGN | PKN1 | SLC46A3 | DPYSL2 | IFNAR1 |
| TIPARP | FAM162A | FBXO43 | LONRF3 | C10orf10 | MICB |
| TMEM236 | TMEM110 | DNAJC5B | EID3 | CKMT1B | IFI30 |
| TLR2 | GDPD5 | BCL2L10 | CD300LF | CD83 | AOAH |
| HAMP | CTSH | LGR5 | ANKRD10 | TWF2 | SUCNR1 |
| CD163L1 | RAMP1 | PHYHIPL | P2RX7 | FAM105A | C19orf12 |
| SIRPA | PTGER4 | NFE2L3 | PLEK | GPRC5A | GNB4 |
| SLC15A3 | APOBR | CD97 | GLRX | SLC39A8 | ID2 |
| RGS1 | KLF5 | FMO1 | HAVCR2 | SLC1A3 | C1QB |
| CD1B | ITGAX | SLC6A12 | CPVL | HAAO | NAIP |
| PDE4B | HDAC9 | SMG9 | FAM228B | IL18R1 | LRRTM2 |
| WDR62 | SLC41A2 | GAA | KLHL29 | CYSLTR2 | METTL7B |
| CECR6 | AF165138.7 | NCAM2 | C7orf31 | FCGR3B | CCL24 |
| ACKR4 | TMEM72 | EN2 | PNRC1 | ZNF25 | ACP5 |
| CFH | PDCD1LG2 | NPDC1 | PRAM1 | VASH1 | GFRA2 |
| UTS2 | C1orf162 | TNFSF15 | ERMN | ACE | NRGN |
| RGS19 | C5orf15 | C1QC | WSCD2 | SSPO | CADM4 |
| FERMT3 | S100A10 | RNF19B | CCDC50 | ARRB2 | LITAF |
| UNC5A | IL10 | CCR5 | TXNDC15 | SH3GL3 | ZNF804A |
| PSAP | JADE2 | RP5-966M1.6 | FBXO31 | SLC7A7 | HK3 |
| TMEM150B | RAB8B | FAM20A | MILR1 | KCTD17 | DENND5B |
| STAB1 | TFPI | CMKLR1 | MICALL2 | CLEC7A | AKAP2 |
| SIGLEC15 | PADI4 | CCDC149 | IL4I1 | CYP4V2 | SH3KBP1 |
| SEMA5B | SOD2 | EMR2 | CEACAM4 | CLEC6A | MAN2B2 |
| EBF3 | ZNF165 | RASGRP4 | SLC2A11 | GPR183 | TREM2 |
| ATP6V1B2 | CTC-512J12.6 | EID2B | NAGPA | STARD9 | FPR2 |
| FAM83C | HSD11B1 | FOLR2 | CMTM2 | LRFN3 | IFFO1 |
| IFT27 | SLC29A3 | NCF2 | KMO | MAS1 | ZNF853 |
| MS4A7 | MGAT1 | AC069368.3 | ZMYND15 | ZFYVE21 | SGTB |
| HTRA4 | C8orf4 | MICAL1 | LXN | RBMS3 | LGI2 |
| PLD3 | FOXP3 | ESRP1 | MSANTD3-TMEFF1 | TNFRSF8 | TNFRSF9 |
| SERPING1 | MYO1F | GPR97 | GLIPR2 | CD300C | FAM83G |
| LILRB5 | SIDT2 | ITGA4 | NLRP12 | RNASE1 | CYTH4 |
| SMCO4 | SARDH | FOXF1 | SDS | BATF3 |  |

**Supplementary Table S3A: 124 intersection genes were acquired by overlap analysis.**

| EIF2AK2 | MMP7 | CCM2 | CLEC7A | PLD3 | TREM2 |
| --- | --- | --- | --- | --- | --- |
| STAT1 | APOC1 | APOL1 | TYROBP | FCGR3A | SDS |
| CTSC | FTL | CXCL10 | IL7R | RELB | DRAM1 |
| TYMP | CHI3L1 | IFI44L | TRPV2 | COTL1 | CXCR4 |
| HLA-F | FCGR2A | FJX1 | APOE | CXCL9 | MMP12 |
| LY6E | PRAME | PAIP2B | CXCL5 | NFKBIE | OLR1 |
| IFI44 | AQP9 | WARS | FCER1G | SDC3 | MMP9 |
| LY6K | RENBP | MIIP | ETS1 | PILRA | OTOP3 |
| LYPD1 | WIPF1 | AIM2 | C1S | SLC15A3 | ACP5 |
| HLA-B | GDPD2 | HLA-C | PLEKHO1 | RSAD2 | ITGB2 |
| OASL | IL4I1 | EPSTI1 | ICAM1 | LAMP3 | LCP1 |
| UBE2L6 | SPP1 | ADH7 | ARL4D | CXCL11 | CTSZ |
| IFIT2 | UGT1A10 | TAP1 | OLFM1 | NLRC5 | SHISA2 |
| TLR3 | SERPINA1 | HERC5 | SLAMF8 | HLA-A | SLC2A6 |
| FBXL6 | IL18 | B3GAT3 | PLA2G7 | IFIT1 | CD83 |
| IFIT3 | THEMIS2 | SH2D2A | BCL2A1 | BST2 | GPRC5A |
| GNLY | ABCD1 | PARP12 | PKN1 | IFI27 | CTSL |
| HLA-G | NINJ1 | IFI6 | GAA | IFI35 | LHFPL2 |
| KLHDC7B | MARCKSL1 | DNAH17 | ADAMDEC1 | FPR3 | ALOX12 |
| ISG15 | ITGAX | PSMB9 | CST1 | ADAM8 | LY96 |
| MAD2L2 | FOXP3 | IL32 | SNX10 |  |  |

**Table S4A:** Analysis of the expression of RENBP and the clinical pathological parameters.

| characteristics | Level | Low Expression | High Expression | P |
| --- | --- | --- | --- | --- |
| Gender | Male | 14 | 14 | 1.000 |
|  | Female | 1 | 0 |  |
| Age | ≤60 | 6 | 3 | 0.427 |
|  | ＞60 | 9 | 11 |  |
| T Staging | T1, T2 | 4 | 5 | 0.700 |
|  | T3, T4 | 11 | 9 |  |
| N Staging | N0 | 10 | 10 | 1.000 |
|  | N1, N2, N3 | 5 | 4 |  |
| Clinical Staging | Ⅰ, Ⅱ | 4 | 4 | 1.000 |
|  | Ⅲ, Ⅳ | 11 | 10 |  |
| Degree of Differentiation | Moderately and Poorly Differentiated | 12 | 11 | 1.000 |
|  | Well Differentiated | 3 | 3 |  |
| Smoking History | No | 2 | 0 | 0.483 |
|  | Yes | 13 | 14 |  |
| Drinking History | No | 11 | 10 | 1.000 |
|  | Yes | 4 | 4 |  |

**Table S4B:** Analysis of the expression of OLR1 and the clinical pathological parameters.

| characteristics | Level | Low Expression | High Expression | P |
| --- | --- | --- | --- | --- |
| Gender | Male | 15 | 13 | 0.483 |
|  | Female | 0 | 1 |  |
| Age | ≤60 | 5 | 4 | 1.000 |
|  | ＞60 | 10 | 10 |  |
| T Staging | T1, T2 | 2 | 7 | 0.050 |
|  | T3, T4 | 13 | 7 |  |
| N Staging | N0 | 8 | 12 | 0.109 |
|  | N1, N2, N3 | 7 | 2 |  |
| Clinical Staging | Ⅰ, Ⅱ | 2 | 6 | 0.109 |
|  | Ⅲ, Ⅳ | 13 | 8 |  |
| Degree of Differentiation | Moderately and Poorly Differentiated | 13 | 10 | 0.390 |
|  | Well Differentiated | 2 | 4 |  |
| Smoking History | No | 1 | 1 | 1.000 |
|  | Yes | 14 | 13 |  |
| Drinking History | No | 10 | 11 | 0.682 |
|  | Yes | 5 | 3 |  |

Taken the median of the difference between the RT-qPCR results of cancer and adjacent cancer as the critical value, laryngeal cancer patients were divided into the OLR1 low expression group (15 cases), OLR1 high expression group (14 cases), RENBP low expression group (15 cases) and the RENBP high expression group (14 cases). We analyzed the relationship between the expression levels of OLR1 and RENBP genes and clinical pathological parameters of patients by using Fisher's exact probability method. The analysis results showed that there were no statistically significant differences (P<0.05) in age, gender, N stage, clinical stage, degree of differentiation, smoking and drinking among laryngeal cancer patients with different levels of OLR1 and RENBP expression. But there is a difference between the expression of OLR1 and T staging.

Raw Data: The raw data of this study can be found in **Figshare**. DOI. 10.6084/m9.figshare.26799013
