# Supplementary material for: Prognostic value and immunotherapy analysis of immune cell-related genes in laryngeal cancer
Source: PeerJ journal article supplement (doi:10.7717/peerj.19239), 2025-04-14
Supplement: Translation.docx [file Translation.docx]

Original text：P

Translation：癌旁组织

Original text：CA

Translation：癌组织

Original text：Mean

Translation：平均值

Original text：The difference

Translation：差值

Original text：Data processing methods: For paired samples, the difference was tested for normal distribution by Shapiro-wilk test. T-test was used if it meets the criteria. Otherwise, the Wilcoxon test was employed.

Translation：数据处理方法：对于配对样本，通过Shapiro-wilk检验对差异进行正态分布检验。如果符合标准，则使用T检验。否则，采用Wilcoxon检验。

Original text：Relative multiple 1/2/3

Translation：相对倍数1/2/3

Original text：SD

Translation：方差
